# Supplementary material
Source: HighWire-hosted journal article supplement (https://bjsm.bmj.com/content/56/10/553)
Supplement: inline-supplementary-material-3 [file inline-supplementary-material-3.pdf]

Supplement table 3 - CMR findings of post-COVID athletes with PCR confirmed reinfection

| Athlete No. | Sex  | Symptoms at the first infection                                                                         | CMR findings                                                                                                                                                                         | CMR images                                                                                                | Symptoms at the reinfection                                                                                                                                               | Time to follow-up CMR from COVID-19 (days) | Follow-up CMR findings                                                                                                                                                               | Follow-up CMR images                                                                                       |
|-------------|------|---------------------------------------------------------------------------------------------------------|--------------------------------------------------------------------------------------------------------------------------------------------------------------------------------------|-----------------------------------------------------------------------------------------------------------|---------------------------------------------------------------------------------------------------------------------------------------------------------------------------|--------------------------------------------|--------------------------------------------------------------------------------------------------------------------------------------------------------------------------------------|------------------------------------------------------------------------------------------------------------|
| 8.          | Male | Asymptomatic                                                                                            | LVEF: 51 %<br>GLS: -19 %<br>LVEDVi: 111 ml/m <sup>2</sup><br>LVMI: 60 g/m <sup>2</sup><br><br>Septal native T1: normal<br>Septal native T2: normal<br>Pathological LGE / pattern: No | 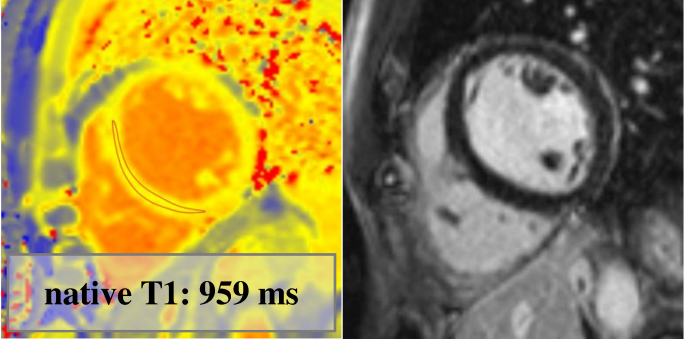<br>native T1: 959 ms   | Mild <ul style="list-style-type: none"> <li>• fever</li> <li>• fatigue</li> <li>• smell and taste disturbance</li> </ul>                                                  | 92                                         | LVEF: 55 %<br>GLS: -18 %<br>LVEDVi: 114 ml/m <sup>2</sup><br>LVMI: 64 g/m <sup>2</sup><br><br>Septal native T1: normal<br>Septal native T2: normal<br>Pathological LGE / pattern: No | <br>native T1: 953 ms   |
| 9.          | Male | Asymptomatic                                                                                            | LVEF: 57 %<br>GLS: -23 %<br>LVEDVi: 131 ml/m <sup>2</sup><br>LVMI: 67 g/m <sup>2</sup><br><br>Septal native T1: normal<br>Septal native T2: normal<br>Pathological LGE / pattern: No | <br>native T1: 957 ms  | Mild <ul style="list-style-type: none"> <li>• fever</li> <li>• headache</li> <li>• fatigue</li> <li>• smell and taste disturbance</li> </ul>                              | 91                                         | LVEF: 56 %<br>GLS: -20 %<br>LVEDVi: 129 ml/m <sup>2</sup><br>LVMI: 62 g/m <sup>2</sup><br><br>Septal native T1: normal<br>Septal native T2: normal<br>Pathological LGE / pattern: No | <br>native T1: 948 ms  |
| 10.         | Male | Mild <ul style="list-style-type: none"> <li>• fatigue</li> <li>• smell and taste disturbance</li> </ul> | LVEF: 54 %<br>GLS: -22 %<br>LVEDVi: 144 ml/m <sup>2</sup><br>LVMI: 74 g/m <sup>2</sup><br><br>Septal native T1: normal<br>Septal native T2: normal<br>Pathological LGE / pattern: No | <br>native T1: 935 ms | Mild <ul style="list-style-type: none"> <li>• fever</li> <li>• fatigue</li> <li>• smell and taste disturbance</li> </ul>                                                  | 92                                         | LVEF: 57 %<br>GLS: -20 %<br>LVEDVi: 133 ml/m <sup>2</sup><br>LVMI: 71 g/m <sup>2</sup><br><br>Septal native T1: normal<br>Septal native T2: normal<br>Pathological LGE / pattern: No | <br>native T1: 955 ms |
| 11.         | Male | Asymptomatic                                                                                            | LVEF: 55 %<br>GLS: -18 %<br>LVEDVi: 125 ml/m <sup>2</sup><br>LVMI: 70 g/m <sup>2</sup><br><br>Septal native T1: normal<br>Septal native T2: normal<br>Pathological LGE / pattern: No | <br>native T1: 940 ms | Moderate <ul style="list-style-type: none"> <li>• headache</li> <li>• fever</li> <li>• mild chest pain</li> <li>• cough</li> <li>• smell and taste disturbance</li> </ul> | 184                                        | LVEF: 56 %<br>GLS: -18 %<br>LVEDVi: 121 ml/m <sup>2</sup><br>LVMI: 62 g/m <sup>2</sup><br><br>Septal native T1: normal<br>Septal native T2: normal<br>Pathological LGE / pattern: No | <br>native T1: 970 ms |
